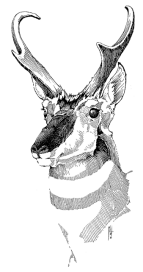

## A new species of squirrel (Sciuridae: *Callosciurus*) from an isolated island off the Indochina Peninsula in southern Vietnam

SON TRUONG NGUYEN, TATSUO OSHIDA,\* PHUONG HUY DANG, HAI TUAN BUI, AND MASAHARU MOTOKAWA

Department of Vertebrate Zoology, Institute of Ecology and Biological Resources, Vietnam Academy of Science and Technology, 18 Hoang Quoc Viet, Cau Giay, Hanoi, Vietnam (STN, PHD)

Graduate University of Science and Technology, Vietnam Academy of Science and Technology, 18 Hoang Quoc Viet, Cau Giay, Hanoi, Vietnam (STN)

The Kyoto University Museum, Kyoto University, Kyoto 606-8501, Japan (STN, MM)

Laboratory of Wildlife Biology, Obihiro University of Agriculture and Veterinary Medicine, West 2-11, Inada, Obihiro 080-8555, Japan (TO)

Department of Nature Conservation, Vietnam National Museum of Nature, Vietnam Academy of Science and Technology, 18 Hoang Quoc Viet, Cau Giay, Hanoi, Vietnam (HTB)

\* Correspondent: [oshidata@obihiro.ac.jp](mailto:oshidata@obihiro.ac.jp)

We describe a new species of squirrel (Sciuridae, *Callosciurus*) from Hon Khoai Island, located off the coast of southern Vietnam (centered at ca. 8°26'08"N, 104°49'58"E) and discuss its phylogenetic position in the genus *Callosciurus*. Compared to other *Callosciurus* occurring on the Indochina Peninsula, the new species (*Callosciurus honkhoaiensis*) is strikingly small, especially head and body length, body mass, and hind foot length. Unlike other species of *Callosciurus*, the hairs at the tip of the tail are white with a black base, and the venter and feet are whitish cream. The new species at present is known only from the type locality, Hon Khoai Island. Phylogenetically, the new species is closely related to *C. caniceps*, suggesting that it evolved from *C. caniceps* or an ancestor in common with *C. caniceps*, possibly during the Pliocene. Genetic distances between the 2 species calculated from comparison of mitochondrial cytochrome *b* sequences are 10.1–10.3%. During both glaciations and interglaciations of the Pleistocene, the new species may have been isolated from other *Callosciurus* populations by rivers and sea, respectively.

Key words: island endemic species, geographic isolation, Sciuridae, Southeast Asia, Sunda Shelf

During the Pleistocene, glacial and interglacial periods repeatedly alternated (e.g., Williams et al. 1993; Cox and Moore 2005). In Southeast Asia, maximum lowering of sea level during Pleistocene glaciations was about 200 m, enough to have exposed the Sunda Shelf (Hutchison 1989). This lower sea level would have provided land linkages from mainland Southeast Asia (the Indochina and Malay Peninsulas) to the islands of the Sunda Shelf (Borneo, Sumatra, and Java), thereby forming a large continental mass known as Sundaland (Tjia 1980; Williams et al. 1993; MacKinnon et al. 1996; Hanebuth et al. 2000). After the last glacial period, Sundaland disappeared and the present-day geological structures were formed (MacKinnon et al. 1996).

During the Pleistocene, many mammal species were biogeographically affected by the geological changes in Sundaland

(Abegg and Thierry 2002; Meijaard 2003; Harrison et al. 2006; Nater et al. 2017). During glacial periods, geographic barriers such as large rivers separated populations of mammal species on Sundaland (MacKinnon et al. 1996). After the last glacial period, rising sea levels separated islands from the Asian continent, thereby forming additional geographic barriers for mammals. At present, there are many small islands off the coast of the southern Indochina Peninsula in the northern Gulf of Thailand, on which numerous mammal species are to be found (Kuznetsov 2000). These islands are thought to have been a part of Sundaland and were isolated from the mainland as water levels rose following glaciations (Tjia 1980; MacKinnon et al. 1996). The Gulf of Thailand is relatively shallow: average and maximum depths are only about 45 m and 80 m, respectively (Bridges 1990; Rundel 1999; Tran

et al. 2012). Therefore, mammals on islands in this body of water have not long been geographically isolated from those on the mainland. Seventeen species of mammals on Phu Quoc Island also are found on the mainland (Abramov et al. 2007). On the other hand, a new shrew species (*Crocidura phuquocensis*) has been described from Phu Quoc Island (Abramov et al. 2008) and the psychedelic rock gecko (*Cnemaspis psychedelica*) was described as a new species endemic to Hon Khoai and Hon Tuong Islands (Grismer et al. 2010; Ngo et al. 2016), suggesting that the islands located south of the Indochina Peninsula (Fig. 1) may have a more unique fauna and complicated geological history than previously thought. One of these islands, Hon Khoai (Fig. 1) is located 18 km from the southern tip of the Ca Mau Peninsula and is part of the Hon Khoai archipelago (Hon Lon, Hon Nho, Hon Tuong, Hon Sao, and Hon Doi Hon Islands—Ministry of Culture, Sport and Tourism, Vietnam [2017]). Hon Khoai is only 8.0 km<sup>2</sup> in area and has a dense tree cover of primary tropical forest.

One species of squirrel, *Callosciurus* Gray, 1867, is found on this small island. The genus *Callosciurus* occurs widely in South and Southeast Asia and is presently hypothesized to contain 14 species (Thorington et al. 2012): *C. adamsi* Kloss, 1921, *C. baluensis* Bonhote, 1901, *C. caniceps* Gray, 1842, *C. erythraeus* Pallas, 1779, *C. finlaysonii* Horsfield, 1823, *C. inornatus* Gray, 1867, *C. melanogasteri* Thomas, 1895, *C. nigrovittatus* Horsfield, 1823, *C. notatus* Boddaert, 1785, *C. orestes* Thomas, 1895, *C. phayrei* Blyth, 1856, *C. prevostii* Desmarest, 1822, *C. pygerythrus* I. Geoffroy Saint Hilaire, 1833, and *C. quinquestriatus* Anderson, 1871. Each species shows extensive geographic variation and several named subspecies (Corbet and Hill 1992; Thorington and Hoffmann 2005); as a consequence, the taxonomy of the genus *Callosciurus* remains poorly understood.

The genus *Callosciurus* could be a useful model for testing biogeographic and phylogeographic hypotheses due to its apparent sensitivity to geographic changes. In Southeast Asia, rivers could potentially constitute barriers that induce speciation in *Callosciurus* species (Oshida et al. 2001, 2011, 2013, 2016), thus adding support to the riverine barrier hypothesis (e.g., Salo et al. 1986; MacKinnon et al. 1996; Meijaard and Groves 2006; Arora et al. 2010). In Taiwan, mountain ranges likely acted as a geographic barrier dividing populations of *C. erythraeus*, producing genetically distinct phylogroups (Oshida et al. 2006). Insofar as testing for the effects of geographic isolation, *Callosciurus* could, therefore, constitute an informative model system. In the present study, we tested the hypothesis that the Hon Khoai Island squirrel is a geographic variant of a *Callosciurus* species already occurring on the Indochina Peninsula against its alternative, that the Hon Khoai Island *Callosciurus* is instead endemic to Hon Khoai Island and should be treated as a new species.

We examined external and cranial morphological characters of the Hon Khoai squirrel and analyzed its phylogenetic relationships with other *Callosciurus* species by using mitochondrial (mt) DNA cytochrome *b* (*Cytb*) sequences. Here, we assess the taxonomic status of the *Callosciurus* from Hon Khoai Island resulting from our test of the above hypothesis and discuss the influence of geographic isolation between the Indochina Peninsula and adjacent small islands.

## MATERIALS AND METHODS

**Study region.**—Hon Khoai Island is located off the southern end of the eastern Indochina Peninsula (8°25'00"–8°27'15"N 104°49'10"–104°50'45"E; Fig. 1). Annual averages for temperature and humidity are  $26.7 \pm 0.84^\circ\text{C}$  and  $83.9 \pm 3.4\%$ , respectively (Grismer et al. 2010; Tran et al. 2012; Ngo et al. 2016).

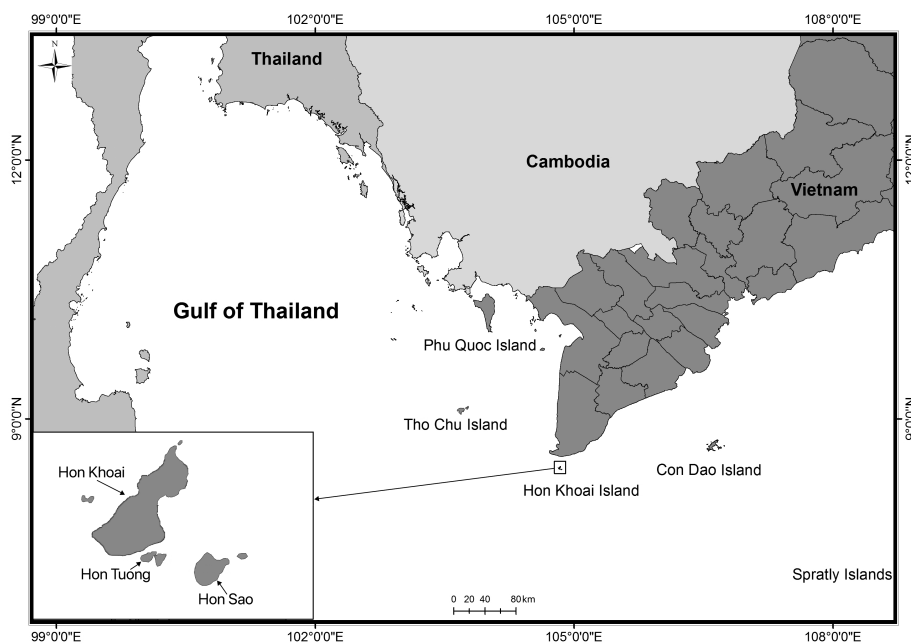

Fig. 1.—Locality of Hon Khoai Island, Vietnam.

The island's peak elevation is 318 m above sea level. Hon Khoai is a rocky island covered with tropical primary forests mainly consisting of *Ficus* spp. (Rosales: Moraceae), *Garicinia* spp. (Malpighiales: Clusiaceae), *Knema saxatilis* (Magnoliales: Myristicaceae), *Lagerstroemia caryculata* (Myrtales: Lythraceae), *Sandoricum koetjape* (Sapindales: Meliaceae), *Semecarpus cochinchinensis* (Sapindales: Anacardiaceae), *Syzygium* spp. (Myrtales: Myrtaceae), *Terminalia calaman-sanai* (Myrtales: Combretaceae), and *Wrightia pubescens* (Gentianales: Apocynaceae) (Nguyen 2017).

**Collecting.**—In January 2017, we used cage traps (15 cm × 15 cm × 25 cm) to collect 3 *Callosciurus* specimens from Hon Khoai Island: 2 females (specimen numbers HK-2017.44 and HK-2017.48) and 1 male (HK-2017.31), following methods approved in the Animal Care and Use Guidelines of the American Society of Mammalogists (Sikes et al. 2016). Specimens are deposited at the Institute of Ecology and Biological Resources (IEBR), Vietnam Academy of Science and Technology, Hanoi, Vietnam.

**External characters and cranial measurements.**—We recorded pelage characters of the squirrels in detail and measured head and body length (HB), tail length (T), hind foot length (HF), and ear length (E) in millimeters, and body mass (BW) in grams. Following Endo et al. (2004a, 2004b), Musser et al. (2006), and Hayashida et al. (2007), 30 skull dimensions were measured with a digital caliper (Mitsutoyo, NTD12-15PMX, Kawasaki, Japan) to an accuracy of 0.01 mm. Cranial measurements included: maximum (greatest) length of skull (ML), condylobasal length (CL), distance from anterior incisor to posterior last molar (DIM), median palatal breadth (MPL), maximum width across both nasal bones (MWN), maximum width of rostrum (MWR), least breadth between the orbits (LBO), least breadth of caudal point of zygomatic process of frontal bone (LBC), greatest neurocranium breadth (GNB), greatest occipital breadth (GOB), zygomatic breadth (ZB), length of rostrum (LR), greatest length of molar tooth row (GLMR1), length of bony palate (LBP), longest length of incisive foramina (LIF), greatest palatal breadth (GPB), length from basion to the most rostral point of zygomatic arch (LBRZ), length from basion to the most rostral point of orbit (LBRO), length from basion to the sagittal and rostral point of temporal bone (LBSR), length from basion to staphylion (LBS), length of auditory bulla (LAB), height from bony palate to the end of nasal bone (HBPNB), braincase height (BCH), and height from akrokranium to basion (HAB). Mandible measurements included: greatest length from the condyle (LC), greatest length of molar tooth row (GLMR2), thickness of mandible at middle point of M1 (TM), height of the mandible at M1 (HM), aboral height of the vertical ramus (AHR), and oral height of the vertical ramus (OHR) (Fig. 2).

**DNA extraction, amplification, and sequencing.**—Total genomic DNA was extracted from 99% ethanol-preserved muscle tissue using DNeasy Blood & Tissue Kit (QIAGEN K.K., Tokyo, Japan). The complete mitochondrial *Cytb* gene sequence (1,140 bases) was amplified with PCR using primer set L14724 5′-GATATGAAAACCATCGTTG-3′ and

H15910 5′-GATTTTTGGTTTACAAGACCGAG-3′ (Kocher et al. 1989 and Oshida et al. 2000, respectively). The 50 µl reaction mixture contained approximately 100 ng of genomic DNA, 0.25 µM of each primer, 200 µM dNTPs, 10 mM Tris-HCl (pH 8.3), 50 mM KCl, 1.5 mM MgCl<sub>2</sub>, and 2.5 units of *rTaq* DNA polymerase (Takara, Tokyo, Japan). Amplification was carried out for 35 cycles. PCR cycle protocol was: 94°C for 1 min, 55°C for 1 min, and 72°C for 2 min. A final extension reaction after 35 cycles was carried out at 72°C for 10 min. PCR products were purified with PCR Clean Up-M (Viogene, Taipei, Taiwan) and directly sequenced by the ABI PRISM BigDye Terminator Cycle Sequencing Ready Reaction Kit V3.1 (Applied Biosystems, Carlsbad, California) and automated DNA sequencer (ABI PRISM 377-96 Sequencer, the ABI PRISM 3100 Genetic Analyzer, Applied Biosystems). For sequencing, we used the same primers used for PCR. Purification of PCR products and sequencing were carried out by Mission Biotech Co. Ltd. (Taipei, Taiwan).

**Molecular phylogenetic analyses.**—Sequences were aligned with the software program DNASIS (Hitachi, Tokyo, Japan). We found 2 haplotypes among the 3 specimens: DNA Data Bank of Japan (DDBJ) accession number LC306835 (HK-2017.31 and HK-2017.44) and DDBJ accession number LC306836 (HK-2017.48). To resolve the phylogenetic position of the Hon Khoai *Callosciurus*, we compared the resulting sequences to available GenBank sequence data for *C. caniceps* (AB499918-19), *C. erythraeus* (AB499908-9), *C. finlaysonii* (AB499910-11), *C. inornatus* (AB499905-7), *C. nigrovittatus* (AB499916-17), *C. notatus* (AB499912-13), and *C. prevostii* (AB499914-15) generated by Oshida et al. (2011). We calculated *p*-distances among all squirrel sequences. To root phylogenetic trees, we used sequence data from the 3-striped ground squirrel, *Lariscus insignis* (AB499904—Oshida et al. 2011). This is the most appropriate outgroup for resolving phylogenetic relationships among *Callosciurus* species given its hypothesized sister relationship to *Callosciurus* (Mercer and Roth 2003).

We used MODELTEST 3.06 (Posada and Crandall 1998) to select the model of molecular evolution based on the Akaike Information Criterion (AIC) for the maximum likelihood (ML) analyses. The resulting model obtained was the general time reversible (GTR) model of substitution (Rodríguez et al. 1990; Yang et al. 1994), taking into account the proportion of invariable sites (0.5380), with a gamma distribution for variable sites (1.6406) (GTR + I + Γ). Base frequencies were estimated as A = 0.2759, C = 0.3297, G = 0.1166, and T = 0.2778. The rate matrix was estimated as A–C = 1.4476, A–G = 21.0174, A–T = 3.4345, C–G = 0.5485, C–T = 38.9655, and G–T = 1.0000. Using the genetic distances correlated by this model, we also carried out a neighbor-joining (NJ) analysis (Saitou and Nei 1987). In addition, we carried out an unweighted maximum parsimony (MP) analysis. Both ML and MP trees were constructed using the heuristic search option with tree-bisection-reconnection (TBR). To assess nodal supports, bootstrapping (Felsenstein 1985) was conducted with 1,000 replications in ML analysis and 5,000 replications in

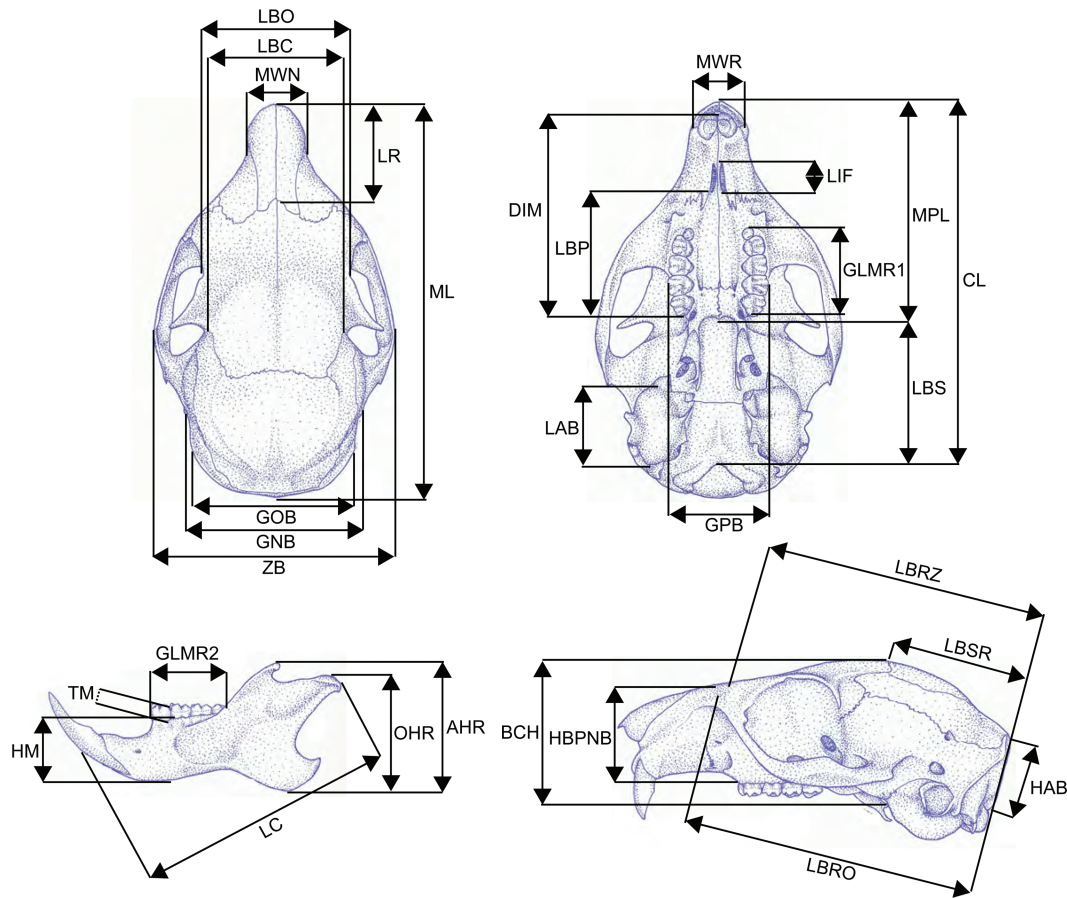

**Fig. 2.**—Cranial and mandibular measurements used in the present study. See text for additional information. Figures were adapted from [Abe \(2000\)](#). AHR = aboral height of the vertical ramus; BCH = braincase height; CL = condylobasal length; DIM = distance from anterior incisor to posterior last molar; GLMR1 = greatest length of molar tooth row; GLMR2 = greatest length of molar tooth row; GNB = greatest neurocranium breadth; GOB = greatest occipital breadth; GPB = greatest palatal breadth; HAB = height from akrokranium to basion; HBPNB = height from bony palate to the end of nasal bone; HM = height of the mandible at M1; LAB = length of auditory bulla; LBC = least breadth of caudal point of zygomatic process of frontal bone; LBO = least breadth between the orbits; LBP = length of bony palate; LBRO = length from basion to the most rostral point of orbit; LBRZ = length from basion to the most rostral point of zygomatic arch; LBS = length from basion to staphylion; LBSR = length from basion to the sagittal and rostral point of temporal bone; LC = greatest length from the condyle; LIF = longest length of incisive foramina; LR = length of rostrum; ML = maximum (greatest) length of skull; MPL = median palatal breadth; MWN = maximum width across both nasal bones; MWR = maximum width of rostrum; OHR = oral height of the vertical ramus; TM = thickness of mandible at middle point of M1; ZB = zygomatic breadth.

MP and NJ analyses. The ML analysis and the MP and NJ analyses were undertaken using RAxML v8.2.X ([Stamatakis 2014](#)) in the CIPRES Science Gateway ([Miller et al. 2015](#)) and PAUP\* 4.0b10 ([Swofford 2001](#)), respectively. Bayesian inference (BI) reconstruction was carried out using MrBayes 3.0b4 ([Huelsenbeck and Ronquist 2001](#)). Bayesian analysis was also conducted using the GTR substitution model selected by MODELTEST for our dataset. This analysis was carried out using 2 runs of 1 million iterations, using 4 Markov chain Monte Carlo (MCMC) chains sampling every 1,000 generations and a burn-in of 10%. A 50% majority rule consensus tree was generated based on the remaining trees. Posterior probabilities were used to assess nodal support of the BI tree.

Divergence times among *Callosciurus* species were estimated using BEAST v. 1.8.3 ([Drummond et al. 2016](#)). Divergence time among the squirrel genera *Callosciurus*, *Dremomys*, and *Sundasciurus* was estimated to be ca.  $11.0 \pm 1.2$  million

years ago (mya) by [Mercer and Roth \(2003\)](#). To set a temporal calibration point, we, therefore, included sequences of *Dremomys pernyi* (HQ698361—[Chang et al. 2011](#)), *D. rufigenis* (EF539341, [Li et al. 2008](#)), and *Sundasciurus mindanensis* (AB444722) in this analysis. We applied a normal distribution as the prior model for calibration and a relaxed molecular clock to allow for uncertainty in the evolutionary rate.

## RESULTS

We captured 3 *Callosciurus* individuals on Hon Khoai Island: all materials were used in the present study. We describe the characteristics of these squirrels in detail below.

*Pelage characteristics.*—Photographs of one of the Hon Khoai squirrels (IEBR-M-6439; field number HK-2017.44) are shown in [Fig. 3](#). Dorsal pelage is agouti, with predominant hue bright orange-brown, agouti bands consisting of black color at

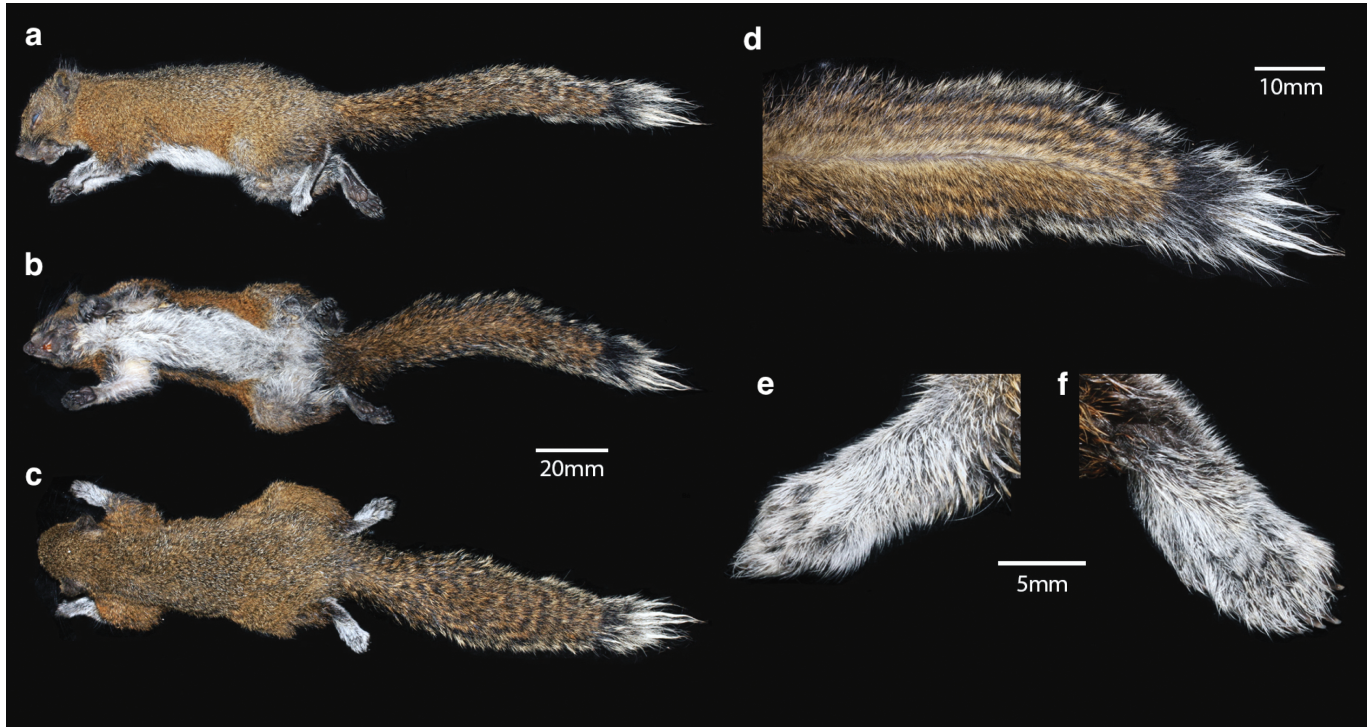

**Fig. 3.**—A *Callosciurus* from Hon Khoai Island, Vietnam: a) lateral pelage, b) ventral pelage, c) dorsal pelage, d) ventral tail fur, e) forelimb, and f) hind limb; the specimen shown (IEBR-M-6439; field number HK-2017.44) is designated as the holotype of a new species in the present study.

base with another band of bright orange-brown color distally (Fig. 3), but muzzle is slightly pale orange buff. Ears are dark gray. Feet are whitish cream. Ventral hairs are mostly whitish cream. Fur on the sides of the body is mostly agouti consisting of black color at base with another band of bright orange-brown color distally, with a sharp demarcation between dorsal and ventral fur. Tail is entirely agouti: bands are black color at base, with another band of bright orange-brown color, and white color distally, but tip hairs near the terminus of the tail (50–55 mm) are unique: the distal portion of each hair is white with a black base.

*External measurements.*—External measurements of the squirrel are shown in Table 1, which includes available measurement information of all *Callosciurus* species, combining data from Moore and Tate (1965), Medway (1978), Payne et al. (1985), Lekagul and McNeely (1988), Corbet and Hill (1992), Lunde and Son (2001), Francis (2008), Hoffmann and Smith (2008), and Thorington et al. (2012). Of the *Callosciurus* species occurring in the Indochina Peninsula, the sample from Hon Khoai had the smallest HB (165.0–175.0 mm), HF (37–38 mm), and BW (150.0–156.0 g).

*Skull measurements.*—Cranium and mandible are shown in Fig. 4. We considered the 3 specimens as adult on the basis of their fully fused basioccipital and basisphenoid. Overall shapes are similar to those of other *Callosciurus* species (e.g., Moore and Tate 1965; Lunde and Son 2001), but sizes of both cranium and mandible are smaller than other *Callosciurus* species (Table 2). Our sample number ( $n = 3$ ) was too small for multivariate analyses: measurements for greatest length of skull and length of maxillary tooth row are included in Table 1. Maxillary

tooth row length (8.8–8.9 mm) was within the range of variation of other *Callosciurus* species occurring in the Indochina Peninsula, but greatest length of skull (45 mm) was smaller than all *Callosciurus* species except *C. caniceps*.

*Phylogenetic analysis.*—Complete *Cytb* sequences (1,140 bp) were deposited in DDBJ under accession numbers LC306835 and LC306836. The ML search produced a single tree (Fig. 5). Branching patterns of the NJ, MP, and BI trees were similar to those of the ML tree (data not shown). Under all models, 3 major lineages were obtained: 1) *C. caniceps*, *C. erythraeus*, *C. finlaysonii*, *C. inornatus*, and *C. sp.* from Hon Khoai; 2) *C. notatus*; and 3) *C. nigrovittatus* and *C. prevostii*. Except for the additional *C. sp.* from Hon Khoai, phylogenetic relationships were essentially similar to those previously elucidated by Oshida et al. (2011).

The lineage including *Callosciurus* species occurring in the Indochina Peninsula and on Hon Khoai Island (Fig. 5) had high support values (83% in the ML tree, 83% in the MP tree, 96% in the NJ tree, and 1.0 in the BI tree). Within this lineage, there were 2 sublineages: 1 consisting of *C. erythraeus* and *C. finlaysonii*, the other with *C. caniceps*, *C. inornatus*, and *C. sp.* from Hon Khoai Island. These sublineages had 100% support values in the ML, MP, and NJ trees and 1.0 in the BI tree (Fig. 5). The Hon Khoai squirrels were most closely related to *C. caniceps*, with high support values in the MP tree (84%), NJ tree (91%), and BI tree (1.0), but not in the ML tree (60%). The *p*-distances between the Hon Khoai *Callosciurus* and other congeners are shown in Table 3. *Cytb* sequence divergences (*p*-distances) between the Hon Khoai *Callosciurus* and other *Callosciurus* species from the Indochina Peninsula are 10.1–14.8%. The

**Table 1.**—External and cranial measurements of all *Callosciurus* species. Our original data are in bold.

| Species                   | Head and body length (mm) |                            | Tail length (mm) |                            | Hind foot length without nail (mm) <sup>a</sup> |                | Body mass (g)              |                      | Greatest skull length (mm) <sup>a</sup> | Maxillary tooth row (mm) <sup>a</sup> |  |
|---------------------------|---------------------------|----------------------------|------------------|----------------------------|-------------------------------------------------|----------------|----------------------------|----------------------|-----------------------------------------|---------------------------------------|--|
|                           | Range <sup>a</sup>        | Mean (n) <sup>b</sup>      |                  | Range <sup>a</sup>         | Mean (n) <sup>b</sup>                           |                | Range <sup>a</sup>         | Mean(n) <sup>b</sup> |                                         |                                       |  |
|                           |                           | Female/male                |                  |                            | Female/male                                     |                |                            | Female/male          |                                         |                                       |  |
| North of the Isthmus Kra  |                           |                            |                  |                            |                                                 |                |                            |                      |                                         |                                       |  |
| <i>C. caniceps</i>        | 180–240                   | 222.3 (11)/215.5 (11)      | 184–242          | 219.4 (9)/242.5 (15)       | 45–50                                           | 165–315        | 312.9 (15)/316.4 (10)      | 44–57                | 8.2–10.5                                |                                       |  |
| <i>C. erythraeus</i>      | 200–260                   | 217.4 (142)/227.9 (15)     | 201–267          | 216.6 (10)/205.3 (15)      | 41–55                                           | 270–350        | 375.1 (343)/359.2 (371)    | 48–57                | 8.2–10.2                                |                                       |  |
| <i>C. finlaysonii</i>     | 188–240                   | 191.8 (13)/190.1 (14)      | 160–254          | 172.8 (13)/173.4 (14)      | 46–49                                           |                | 278.0 (2) <sup>c</sup>     | 45–57                | 8.0–10.2                                |                                       |  |
| <i>C. sp.</i>             | <b>165–175</b>            | <b>175.0 (1)/170.0 (2)</b> | <b>175–190</b>   | <b>180.0 (1)/182.5 (2)</b> | <b>37–38</b>                                    | <b>150–156</b> | <b>152.0 (1)/153.0 (2)</b> | <b>45</b>            | <b>8.8–8.9</b>                          |                                       |  |
| <i>C. inornatus</i>       | 187–230                   | 203.0 (8)/191.0 (10)       | 191–224          | 204.8 (6)/210.8 (4)        | <b>43–51</b>                                    | <b>188–258</b> | 229.6 (13)/226.9 (15)      | 52                   | 9.6–9.7                                 |                                       |  |
| <i>C. phyrei</i>          | 190–250                   | 237.1 (7)/231.5 (4)        | 160–270          | 249.0 (6)/246.8 (4)        | 50–54                                           |                | 377.4 (6)/375.6 (2)        | 46–54                | 7.7–10.3                                |                                       |  |
| <i>C. pygerythrus</i>     | 170–230                   | 189.2 (17)/187.5 (22)      | 110–210          | 175.1 (16)/168.5 (22)      | 41–48                                           | 230–300        | 252.0 (1) <sup>c</sup>     | 45–50                | 7.9–9.0                                 |                                       |  |
| <i>C. quinquestriatus</i> | 200–240                   | 226.5 (n = 2)/–            | 180–210          | 202.0 (1)/–                | 44–55                                           | 258–315        |                            | 50–52                | 9.7–10.1                                |                                       |  |
| South of the Isthmus Kra  |                           |                            |                  |                            |                                                 |                |                            |                      |                                         |                                       |  |
| <i>C. adamsi</i>          | 150–183                   | 170.3(4)/157.0 (1)         | 152–167          | 148.7(3)/158.0 (1)         | 33–40                                           | 115–154        | 150.0 (1)/–                |                      |                                         |                                       |  |
| <i>C. batuensis</i>       | 210–255                   | 244.0 (1)/242.5 (2)        | 215–260          | 251.0 (1)/247.5 (2)        | 48–55                                           |                | 370.5 (2) <sup>c</sup>     |                      |                                         |                                       |  |
| <i>C. melanogaster</i>    | 195–230                   | 212.0 (5)/209.3 (9)        |                  | 180.6 (5)/179.6 (28)       | 43–51                                           |                | 292.3 (3) <sup>c</sup>     |                      |                                         |                                       |  |
| <i>C. nigrovittatus</i>   | 170–240                   | 186.9 (12)/184.3 (11)      | 145–230          | 165.5 (2)/159.2 (5)        | 40–50                                           |                | 239.4 (7)/202.8 (7)        | 45–52                | 8.4                                     |                                       |  |
| <i>C. notatus</i>         | 150–225                   | 237.8 (25)/233.6 (26)      | 160–210          | 170.0 (25)/186.5 (26)      | 38–47                                           | 150–280        | 227.9 (18)/233.9 (17)      | 47–50                | 8.4–9.8                                 |                                       |  |
| <i>C. orestes</i>         | 130–170                   | 154.0 (5)/148.0 (4)        | 128–170          | 139.8 (5)/157.5 (4)        | 32–40                                           |                | 278.0 (1) <sup>c</sup>     |                      |                                         |                                       |  |
| <i>C. prevostii</i>       | 200–270                   | 237.7 (45)/238.9 (43)      | 202–273          | 233.3 (44)/233.0 (42)      | 45–61                                           | 250–500        | 361.9 (27)/357.3 (17)      | 52–60                | 10.4–11.2                               |                                       |  |

<sup>a</sup>Except for our original data, we combined data reported by Moore and Tate (1965), Medway (1978), Payne et al. (1985), Lekagul and McNeely (1988), Corbet and Hill (1992), Lunde and Son (2001), Francis (2008), and Hoffmann and Smith (2008).

<sup>b</sup>Data reported by Thorington et al. (2012).

<sup>c</sup>Sex not stated data.

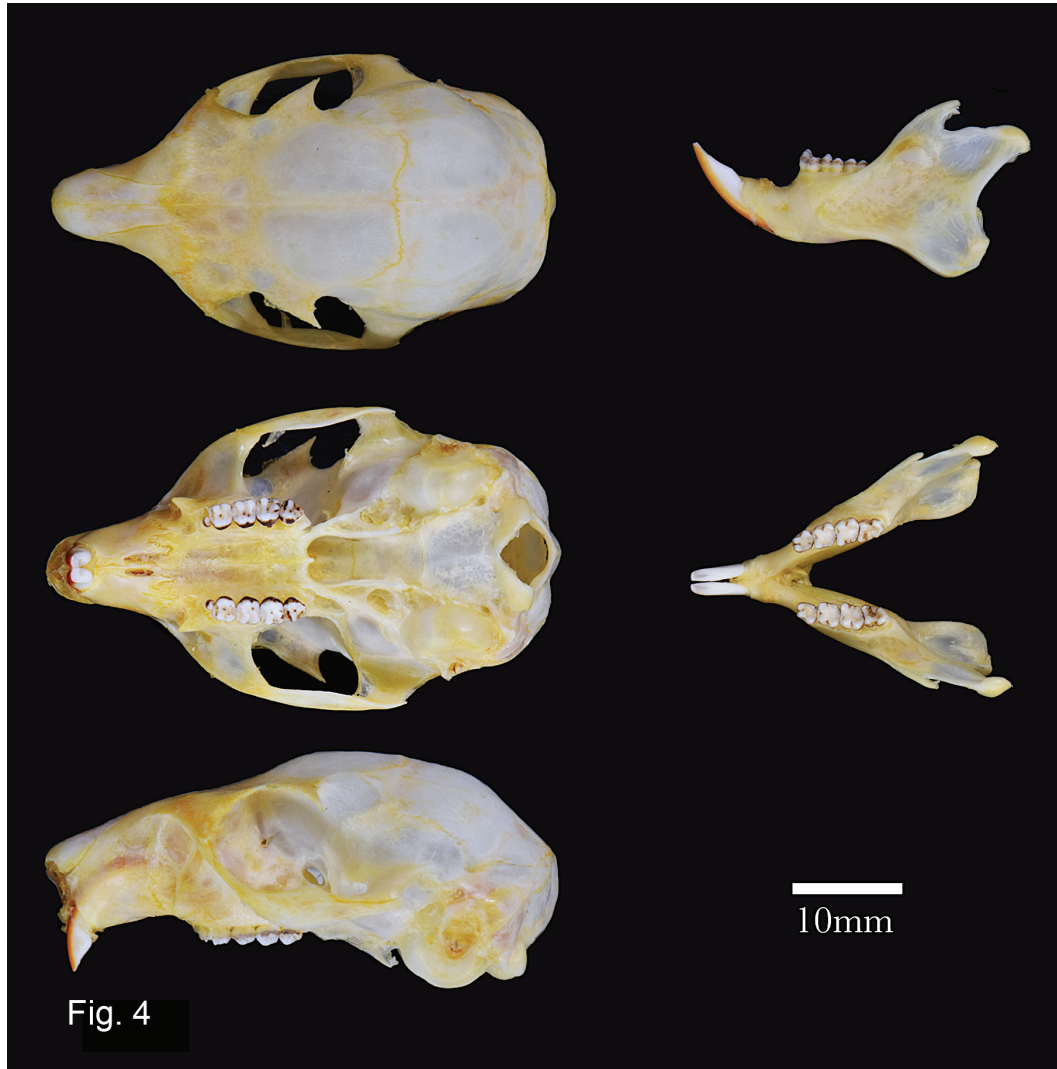

Fig. 4

**Fig. 4.**—Cranium and mandible of *Callosciurus* from Hon Khoai Island; the specimen shown (IEBR-M-6439; field number HK-2017.44) is designated as the holotype of a new species in the present study.

*p*-distances between Hon Khoai squirrels and *C. caniceps* were 10.1–10.3%. Chronological analysis estimated that Hon Khoai squirrels diverged from *C. caniceps* approximately 3.6 mya (95% confidence interval [CI] = 2.7–4.6 mya).

On the basis of both morphological and molecular evidence presented above, we describe the squirrels from Hon Khoai Island, Vietnam, as a new species, with the name mentioned below:

*Callosciurus honkhoaiensis*, sp. nov.  
 Hon Khoai squirrel  
 (Figs. 3 and 4)

**Holotype.**—Museum of the IEBR, Hanoi, Vietnam: number IEBR-M-6439; field number HK-2017.44; adult female; skin, skull, and skeleton. Tissue samples are deposited in IEBR. Holotype collected by Son Truong Nguyen and Phuong Huy Dang on 6 January 2017.

**Type locality.**—Vietnam: Hon Khoai Island in Rach Gia Bay, Ca Mau province.

**Paratypes.**—Skin, skull, and skeleton of 1 male (IEBR-M-6426; field number HK-2017.31) and 1 female

(IEBR-M-6443; field number HK-2017.48), collected on 7 January 2017, also are deposited in the Museum of the IEBR.

**Etymology.**—The specific epithet *honzhoaiensis* refers to Hon Khoai Island, Ca Mau province, where the holotype was collected. We recommend “Hon Khoai squirrel” as an English common name.

**Nomenclatural statement.**—A Life Science Identifier (LSID) was obtained for the new species (*C. honkhoaiensis*): urn:lsid:zoobank.org:pub:5E76A4B0-E680-42A7-A140-0FC286C786D9.

**Diagnosis.**—*Callosciurus honkhoaiensis* is distinguished as the smallest among *Callosciurus* species from the Indochina Peninsula; head and body and body mass are smallest; tail medium; hind foot medium; ear medium; greatest length of skull almost smallest. Pelage color of the dorsum is agouti consisting of bright orange-brown and black; sides are agouti consisting of bright orange-brown and black; venter is whitish cream; feet are whitish cream; tail is agouti consisting of bright orange-brown, black, and white (the hairs at the tip of the tail are white with a black

**Table 2.**—Skull measurements of 3 specimens of *Callosciurus* sp. nov. from Hon Khoai Island, Vietnam. AHR = aboral height of the vertical ramus; BCH = braincase height; CL = condylobasal length; DIM = distance from anterior incisor to posterior last molar; GLMR1 = greatest length of molar tooth row; GLMR2 = greatest length of molar tooth row; GNB = greatest neurocranium breadth; GOB = greatest occipital breadth; GPB = greatest palatal breadth; HAB = height from akrokranium to basion; HBPNB = height from bony palate to the end of nasal bone; HM = height of the mandible at M1; LAB = length of auditory bulla; LBC = least breadth of caudal point of zygomatic process of frontal bone; LBO = least breadth between the orbits; LBP = length of bony palate; LBRO = length from basion to the most rostral point of orbit; LBRZ = length from basion to the most rostral point of zygomatic arch; LBS = length from basion to staphylion; LBSR = length from basion to the sagittal and rostral point of temporal bone; LC = greatest length from the condyle; LIF = longest length of incisive foramina; LR = length of rostrum; ML = maximum (greatest) length of skull; MPL = median palatal breadth; MWN = maximum width across both nasal bones; MWR = maximum width of rostrum; OHR = oral height of the vertical ramus; TM = thickness of mandible at middle point of M1; ZB = zygomatic breadth.

| Variable | Range of measurements (mm) |
|----------|----------------------------|
| ML       | 44.65–45.40                |
| CL       | 40.04–41.00                |
| DIM      | 20.50–21.30                |
| MPL      | 23.17–23.90                |
| MWN      | 9.76–10.92                 |
| LBO      | 15.40–15.56                |
| LBC      | 16.61–17.30                |
| GNB      | 21.00–22.20                |
| GOB      | 19.39–20.05                |
| ZB       | 26.42–27.00                |
| LR       | 11.66–11.95                |
| GLMR1    | 8.84–8.90                  |
| MWR      | 5.55–5.97                  |
| LIF      | 2.45–2.63                  |
| LBP      | 11.93–12.08                |
| LBS      | 16.33–16.80                |
| LAB      | 8.31–8.80                  |
| GPB      | 11.10–11.21                |
| LBRO     | 28.98–29.63                |
| HBPNB    | 10.10–11.29                |
| LBRZ     | 32.92–33.60                |
| LBSR     | 15.74–16.36                |
| BCH      | 15.77–16.60                |
| HAB      | 12.19–12.33                |
| AHR      | 15.25–16.06                |
| OHR      | 14.67–15.15                |
| LC       | 28.99–29.29                |
| GLMR2    | 8.34–8.59                  |
| HM       | 7.84–8.01                  |
| TM       | 2.43–2.85                  |

base); ears are dark gray. The color patterns of tail hairs and whitish cream hairs on the feet constitute important diagnostic characteristics.

**Distribution.**—*Callosciurus honkhoaiensis* is presently known only from Hon Khoai Island located off the coast of the Indochina Peninsula in southern Vietnam (Fig. 1).

**Measurements.**—External measurements of the holotype: head and body length, 175.0 mm; tail length, 180.0 mm;

hindfoot without nail, 38.0 mm; hindfoot with nail, 39.0 mm; ear, 19.5 mm; body mass, 152.0 g. Cranial measurements (in mm) of the holotype are: ML 45.30, CL 41.00, DIM 21.20, MPL 23.70, MWN 10.70, MWR 5.78, LBO 15.56, LBC 16.61, GNB 21.56, GOB 19.80, ZB 26.80, LR 11.95, GLMR1 8.84, LBP 11.93, LIF 2.45, GPB 11.10, LBRZ 33.60, LBRO 29.54, LBSR 15.75, LBS 16.55, LAB 8.53, HBPNB 10.23, BCH 16.03, and HAB 12.19. Mandible measurements (in mm) of the holotype: LC 29.29, GLMR2 8.50, TM 2.85, HM 8.01, AHR 16.06, and OHR 15.15.

**Comparisons.**—Among species of *Callosciurus* from the Indochina Peninsula, *C. honkhoaiensis* is remarkably small, particularly insofar as concerns head and body length and body mass (Table 1). In cranial measurements, with the caveat that it is based on 3 individuals, the greatest length of skull is smallest among the *Callosciurus* species occurring in the Indochina Peninsula (Table 1), being similar to the smallest record of 3 other species of the genus. Species such as *C. finlaysonii* have a broad range of variable pelage patterns (Lekagul and McNeely 1988), making it difficult to distinguish *C. honkhoaiensis* using only pelage characters. However, *C. honkhoaiensis* is distinguishable from *C. caniceps* in pelage patterns. At present, 8 *C. caniceps* subspecies are recognized (Moore and Tate 1965; Thorington et al. 2012): *C. c. adangensis* (Miller, 1903), *C. c. altinsularis* (Miller, 1903), *C. c. bimaculatus* (Temminck, 1853), *C. c. caniceps* (Gray, 1842), *C. c. casensis* (Miller, 1903), *C. c. concolor* (Blyth, 1855), *C. c. domesticus* (Miller, 1903), and *C. c. fallax* (Robinson and Kloss, 1914). In addition, Thorington and Hoffmann (2005) showed 25 synonyms that were not allocated to subspecies. Of those, 23 synonyms have yet to be allocated to any subspecies: *bentincanus* (Miller, 1903), *chrysonotus* (Blyth, 1847), *fluminalis* (Robinson and Wroughton, 1911), *hastilis* Thomas, 1923, *helgei* (Gyldenstolpe, 1917), *helvus* (Shamel, 1930), *inexpectatus* (Kloss, 1916), *lancavensis* (Miller, 1903), *lucas* (Miller, 1903), *mapravis* Thomas and Robinson, 1921, *mathaeus* (Miller, 1903), *moheius* Thomas and Robinson, 1921, *mohillius* Thomas and Robinson, 1921, *nakanus* Thomas and Robinson, 1921, *panjioli* Thomas and Robinson, 1921, *panjius* Thomas and Robinson, 1921, *pipidonis* Thomas and Robinson, 1921, *samuiensis* (Robinson and Kloss, 1914), *sullivanus* (Miller, 1903), *tabaudius* Thomas, 1922, *tacopiis* Thomas and Robinson, 1921, *telibius* Thomas and Robinson, 1921, and *terutavensis* (Thomas and Wroughton, 1909). We compared the pelage characters of *C. honkhoaiensis* with those of every subspecies and synonyms described previously, but did not find any similar to *C. honkhoaiensis* (Table 4). The *Cytb* sequence divergences (*p*-distances) between *C. honkhoaiensis* and other *Callosciurus* species occurring in the Indochina Peninsula are 10.1–14.8%, and those between *C. honkhoaiensis* and *C. caniceps* were 10.1–10.3% (Table 3).

## DISCUSSION

**Phylogenetic position of *Callosciurus honkhoaiensis*.**—Based on morphological characters, *Callosciurus* are separated



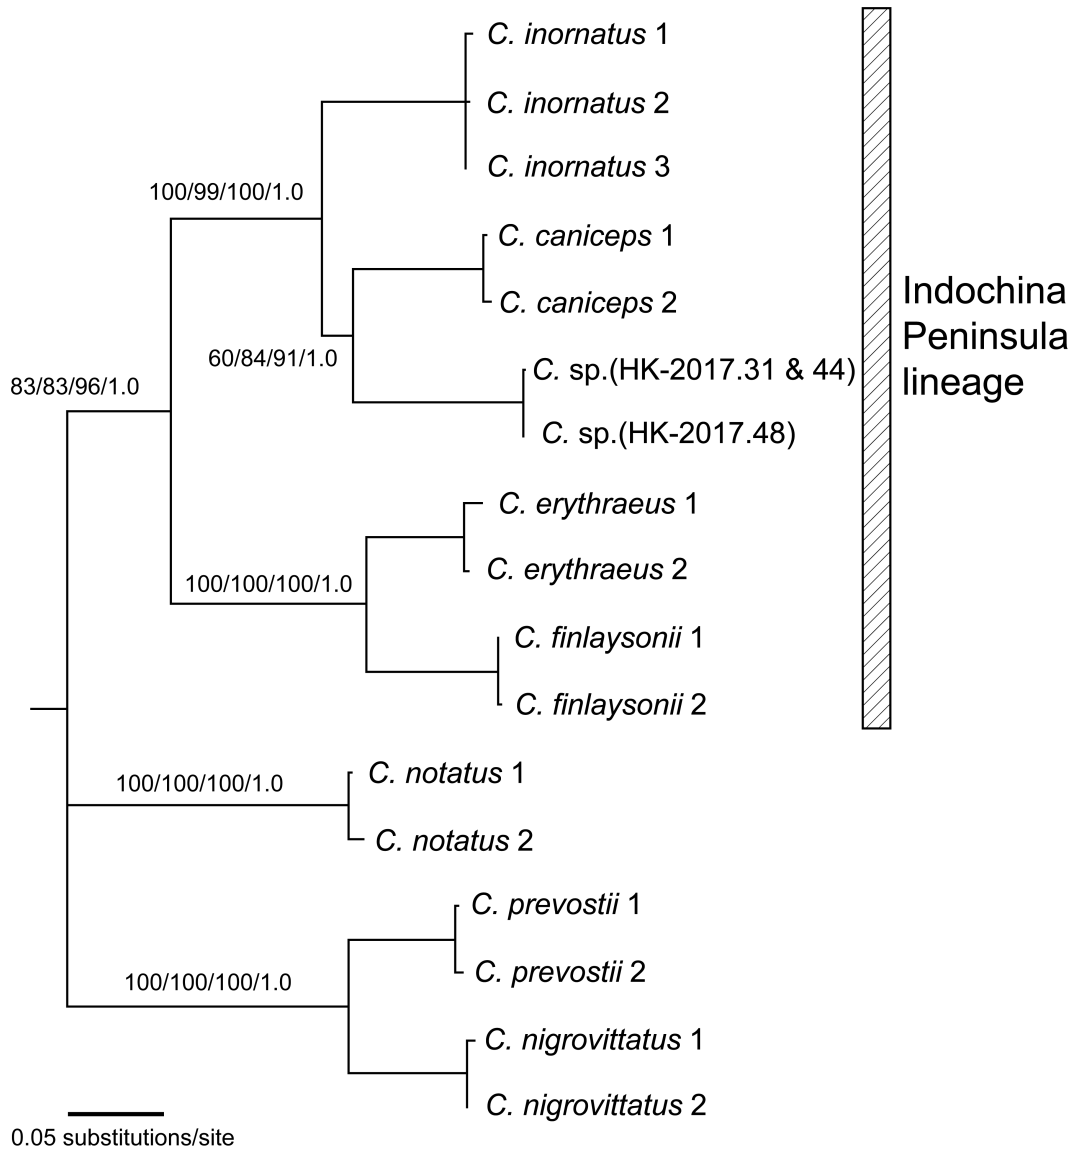

**Fig. 5.**—Maximum likelihood (ML) phylogeny of *Callosciurus* constructed using mitochondrial cytochrome *b* sequences, under the GTR + I +  $\Gamma$  model of evolution. From left, numbers above branches represent bootstrap values from: 1,000 replicates of ML, 5,000 replicates each of unweighted maximum parsimony and neighbor-joining analyses, and posterior probability supports in Bayesian analysis.

**Table 3.**—The *p*-distances (%) of *Cytb* sequences (1,140 bp) among *Callosciurus* species.

|                         | <i>C. caniceps</i> | <i>C. erythraeus</i> | <i>C. finlaysonii</i> | <i>C. inornatus</i> | <i>C. nigrovittatus</i> | <i>C. notatus</i> | <i>C. prevostii</i> | <i>C. sp. nov.</i> |
|-------------------------|--------------------|----------------------|-----------------------|---------------------|-------------------------|-------------------|---------------------|--------------------|
| <i>C. caniceps</i>      |                    | 15.44–15.79          | 14.74–14.83           | 10.53–10.79         | 16.58–16.93             | 16.14–16.67       | 17.02–17.49         | 10.10–10.30        |
| <i>C. erythraeus</i>    |                    |                      | 8.51–9.04             | 13.51–13.77         | 16.14                   | 15.18–15.44       | 15.97–16.32         | 14.40–14.60        |
| <i>C. finlaysonii</i>   |                    |                      |                       | 14.56–14.83         | 16.93                   | 16.32–16.58       | 16.58–16.93         | 14.70–14.80        |
| <i>C. inornatus</i>     |                    |                      |                       |                     | 16.05–16.14             | 15.79–16.23       | 16.84–17.19         | 11.10–11.30        |
| <i>C. nigrovittatus</i> |                    |                      |                       |                     |                         | 15.35–15.61       | 8.68–8.95           | 17.00–17.30        |
| <i>C. notatus</i>       |                    |                      |                       |                     |                         |                   | 15.00–15.79         | 15.20–15.40        |
| <i>C. prevostii</i>     |                    |                      |                       |                     |                         |                   |                     | 17.60–18.30        |
| <i>C. sp. nov.</i>      |                    |                      |                       |                     |                         |                   |                     |                    |

into 2 geographic units: a Mainland unit and a Sundaland unit, which are distributed north and south of the Isthmus of Kra, respectively (Moore and Tate 1965; Corbet and Hill 1992). These biogeographic units also are supported by molecular data (Oshida et al. 2001). In the present study, we identified 3 major

phylogenetic lineages. Species occurring in the Indochina Peninsula clustered together with high support values. The Sundaland species *Callosciurus nigrovittatus* and *C. prevostii* clustered together with high support values, although *C. notatus* was not included in a singular Sundaland unit. However,

**Table 4.**—Comparison of pelage characters between *Callosciurus honkhoaiensis* and previously described forms of *C. caniceps*.

| <i>C. caniceps</i> forms | Pelage characters of <i>C. caniceps</i> forms distinct from <i>C. honkhoaiensis</i>                            | References                  |
|--------------------------|----------------------------------------------------------------------------------------------------------------|-----------------------------|
| Subspecies <sup>a</sup>  |                                                                                                                |                             |
| <i>adangensis</i>        | Dull gray venter                                                                                               | Miller (1903)               |
| <i>altinsularis</i>      | Smoke-gray dorsum                                                                                              | Miller (1903)               |
| <i>bimaculatus</i>       | Black tail tip                                                                                                 | Temminck (1853)             |
| <i>caniceps</i>          | Black tail tip                                                                                                 | Gray (1842)                 |
| <i>casensis</i>          | Pale gray on the underside of the tail                                                                         | Miller (1903)               |
| <i>concolor</i>          | Reddish suffusion in the midline of the back                                                                   | Blyth (1856)                |
| <i>domelicus</i>         | Dull cinnamon-rufous and grizzled gray venter                                                                  | Miller (1903)               |
| <i>fallax</i>            | Grizzled black and buff dorsum                                                                                 | Robinson and Kloss (1914)   |
| Synonyms <sup>b</sup>    |                                                                                                                |                             |
| <i>bentincanus</i>       | Chest and belly with a distinct reddish wash                                                                   | Miller (1903)               |
| <i>chrysonotus</i>       | Pale grizzled ashy venter                                                                                      | Blyth (1847)                |
| <i>fluminalis</i>        | Olive gray dorsum; black tail tip                                                                              | Robinson and Wroughton 1911 |
| <i>hastilis</i>          | Nearly uniform finely grizzled grayish olive                                                                   | Thomas (1923)               |
| <i>helgei</i>            | Slaty gray venter                                                                                              | Gyldenstolpe (1916)         |
| <i>helvus</i>            | Grayish throat and belly                                                                                       | Shamel (1930)               |
| <i>inexpectatus</i>      | Paler pelage                                                                                                   | Kloss (1916)                |
| <i>lancavensis</i>       | Dull gray venter                                                                                               | Miller (1903)               |
| <i>lucas</i>             | Ferruginous sides of neck and of body                                                                          | Miller (1903)               |
| <i>mapravis</i>          | Whole lateral side is ferruginous; white ears                                                                  | Thomas and Robinson (1921)  |
| <i>matthaeus</i>         | Reddish area on sides and neck                                                                                 | Miller (1903)               |
| <i>moheius</i>           | Deep buffy dorsum; grayish white venter; black tail tip                                                        | Thomas and Robinson (1921)  |
| <i>mohillius</i>         | Yellowish coloration; black tail tip                                                                           | Thomas and Robinson (1921)  |
| <i>nakanus</i>           | Ferruginous whole lateral side                                                                                 | Thomas and Robinson (1921)  |
| <i>panjioli</i>          | Black tail tip                                                                                                 | Thomas and Robinson (1921)  |
| <i>panjius</i>           | Black tail tip                                                                                                 | Thomas and Robinson (1921)  |
| <i>pipidonis</i>         | Venter is rufous duller anteriorly with ochraceous on the groin-patches                                        | Thomas and Robinson (1921)  |
| <i>samuiensis</i>        | Grizzled silvery-gray venter                                                                                   | Robinson and Kloss (1914)   |
| <i>sullivanus</i>        | Dull smoke-gray venter with an indistinct darker wash along median line                                        | Miller (1903)               |
| <i>tabaudius</i>         | Dark gray dorsum with intense median line on chest                                                             | Thomas (1922)               |
| <i>tacopius</i>          | Ochraceous venter                                                                                              | Thomas and Robinson (1921)  |
| <i>telibius</i>          | Black tail tip                                                                                                 | Thomas and Robinson (1921)  |
| <i>terutavensis</i>      | Midrib of the tail below and the bases of the hairs of each side to a length of 5–6 mm colored ochraceous buff | Thomas and Wroughton (1909) |

<sup>a</sup> Subspecies are as recognized by Thorington et al. (2012).

<sup>b</sup> These names are not allocated with certainly to existing subspecies (Thorington and Hoffmann 2005).

we stress that we did not use all *Callosciurus* species from Sundaland in the present molecular analyses, but used instead all species occurring on the mainland near Hon Khoai Island; broader taxonomic sampling could lead to changes in the phylogenetic relationships obtained.

*Callosciurus caniceps*, *C. inornatus*, and *C. honkhoaiensis* are clustered together (Fig. 5), with *C. honkhoaiensis* most closely related to *C. caniceps*, the latter of which is distributed in Thailand, peninsular Myanmar, and peninsular Malaysia and adjacent islands (Lekagul and McNeely 1988; Corbet and Hill 1992; Thorington et al. 2012). There are 8 *C. caniceps* subspecies: *adangensis*, *altinsularis*, *bimaculatus*, *caniceps*, *casensis*, *concolor*, *domelicus*, and *fallax*. Five of these (*adangensis*, *altinsularis*, *casensis*, *domelicus*, and *fallax*) are endemic to small islands off the coast of the Malay Peninsula (Thorington et al. 2012).

Based on the estimated divergence time (3.6 mya [95% CI = 2.7–4.6 mya]) between the most recent common ancestor of *C. honkhoaiensis* and *C. caniceps*, we propose here a possible scenario to explain the evolutionary history of *C. honkhoaiensis*. Contrary to our expectations, this estimated divergence time was during the Pliocene rather than the Pleistocene. The

Indochina Peninsula was connected via the Malay Peninsula to Borneo throughout the Miocene, and this connection persisted for several million years until the beginning of the Pliocene (Hall 1998, 2009). Therefore, during the early Pliocene (Zanclean), the ancestral stock of both species might have had a wider distribution in Sundaland, and subsequently diverged into different species. During the early Pliocene, similar divergence events in shrews (Eulypotyphla: Soricidae—Dubey et al. 2008; Esselstyn et al. 2009; Yuan et al. 2013) and murine rodents (Ruedas and Kirsch 1997; Gorog et al. 2004) also have been recognized in the Sundaland. Unfortunately, it is difficult to explain what factors may have affected their divergence. However, sediment cores from a 12-myr record in Lake Baikal indicate that global climatic condition deteriorated suddenly in the early and middle Pliocene (Kashiwaya et al. 2001). The increasingly unstable climates in the Pliocene might have brought about divergence of small-sized mammals. In the present study, the estimated divergence time (3.6 mya) between the most recent common ancestor of *C. honkhoaiensis* and *C. caniceps* lies at the junction of the Zanclean and Piacenzian. Therefore, climatological factors may have contributed to their divergence. Subsequently, during the Pleistocene, the distribution of both

descendant species likely would have been reduced and fragmented because of appearance of the Gulf of Thailand. At that time, mainland *C. caniceps* populations could have become isolated from island *C. honkhoaiensis*. This geological process also may have resulted in the development of the island subspecies of *C. caniceps* (*adangensis*, *altinsularis*, *casensis*, *dome-licus*, and *fallax*), according to the precepts of the vicariance speciation model (Futuyma 1998) or the model of peripheral isolate formation of Frey (1993). In addition, *C. honkhoaiensis* likely evolved into a more distinct species *in situ* on the island. Moreover, during the Pleistocene, *C. honkhoaiensis* may have been geographically isolated from other *C. caniceps* populations by ancient river systems through Sundaland (MacKinnon et al. 1996); although the Hon Khoai population was not completely isolated by the large rivers, these would have impaired or slowed dispersal among populations. Therefore, during both glaciations and interglaciations of the Pleistocene, *C. honkhoaiensis* may have been isolated from other *Callosciurus* populations by both rivers and sea. Because of these factors, it is possible that this species may eventually be found to inhabit other islands in the southern part of Vietnam. Additional faunal studies will be required to adequately resolve the exact distribution of *C. honkhoaiensis*.

At present, we have no robust estimate of the population size of *C. honkhoaiensis*. Because Hon Khoai Island is very small (8.0 km<sup>2</sup>), both the number of squirrels and the magnitude of available resources likely are limited. Preservation of remaining forests on the island is therefore critical for conservation of *C. honkhoaiensis*.

#### ACKNOWLEDGMENTS

We are grateful to N. Q. Truong, N. T. Cuong, and T. Ziegler who provided information on fauna and flora of Hon Khoai Island. We are grateful to N. V. Sinh, N. Q. Truong, and T. Pagel, and C. Landsberg for their cooperation in biodiversity research and conservation. We thank N. X. Tuong for support of the expedition. We thank N. V. Khoi, B. H. Manh, N. V. Say for their assistance in capturing the specimens and providing the photos of squirrels. We also thank N. T. Tao for assistance of field survey. We thank P. Callomon and M. Iwasa for kind suggestion about the new species' name. We thank C. L. Bridgman for her critical reading of the manuscript. This research was funded by Vietnam National Foundation for Science and Technology Development (NAFOSTED) under grant number 106-NN.05-2016.14. This study was partly supported by the Grants-in-Aid for Scientific Research No. 26304009 from the Ministry of Education, Science, Sports, and Culture, Japan and the Zoologische Gesellschaft für Arten und Populationschutz e.V. and the Deutsche Gesellschaft für Herpetologie und Terrarienkunde (Project Code: 3. *Cnemaspis psychedelica*. VNM.2016.DGHT). We thank K. McBee for help in revising the English in the manuscript through the ASM Buddy System. We are grateful to B. Blake for help in the preparation of this manuscript. We also thank L. A. Ruedas, J. L. Koprowski, 1 anonymous reviewer, and E. Heske for comments and edits.

#### LITERATURE CITED

- ABE, H. 2000. Illustrated skulls of Japanese mammals. Hokkaido University Press, Sapporo, Japan (in Japanese).
- ABEGG, C., AND B. THIERRY. 2002. Macaque evolution and dispersal in insular south-east Asia. *Biological Journal of the Linnean Society* 75:555–576.
- ABRAMOV, A. L., P. D. JENKINS, V. V. ROZHOV, AND A. A. KALININ. 2008. Description of a new species of *Crocidura* (Soricomorpha: Soricidae) from the island of Phu Quoc, Vietnam. *Mammalia* 72:269–272.
- ABRAMOV, A. L., A. A. KALININ, AND P. N. MOROZOV. 2007. Mammal survey on Phu Quoc Island, southern Vietnam. *Mammalia* 71:40–47.
- ARORA, N., ET AL. 2010. Effect of Pleistocene glaciations and rivers on the population structure of Bornean orangutans (*Pongo pygmaeus*). *Proceedings of the National Academy of Sciences* 107:21376–21381.
- BLYTH, E. 1847. Supplementary report by the curator, Zoological Department. *Journal of the Asiatic Society of Bengal* 16:864–880.
- BLYTH, E. 1856. Report of the curator, Zoology Department for July 1855. *Journal of the Asiatic Society of Bengal* 24:469–481.
- BRIDGES, E. M. 1990. *World geomorphology*. Cambridge University Press, Cambridge, United Kingdom.
- CHANG, S-W., ET AL. 2011. Ancient hybridization and underestimated species diversity in Asian striped squirrels (genus *Tamiops*): inference from paternal, maternal and biparental markers. *Journal of Zoology* 285:128–138.
- CORBET, G. B., AND J. E. HILL. 1992. *The mammals of the Indomalayan region: a systematic review*. Oxford University Press, New York.
- COX, C. B., AND P. D. MOORE. 2005. *Biogeography: an ecological and evolutionary approach*. 7th ed. Blackwell Publishing, New York.
- DRUMMOND, A. J., A. RAMBAUT, AND M. SUCHARD. 2016. BEAST: Bayesian evolutionary analysis sampling trees. <http://beast.bio.ed.ac.uk/>. ACCESSED 10 May 2016.
- DUBEY, S., N. SALAMIN, M. RUEDI, P. BARRIÈRE, M. COLYN, AND P. VOGEL. 2008. Biogeographic origin and radiation of the Old World crocidurine shrews (Mammalia: Soricidae) inferred from mitochondrial and nuclear genes. *Molecular Phylogenetics and Evolution* 48:953–963.
- ENDO, H., ET AL. 2004a. Geographical and functional-morphological variations of the skull in the gray-bellied squirrel. *The Journal of Veterinary Medical Science* 66:277–282.
- ENDO, H., ET AL. 2004b. Geographical variation of skull size and shape in various populations in the black giant squirrel. *The Journal of Veterinary Medical Science* 66:1213–1218.
- ESSELSTYN, J. A., R. M. TIMM, AND R. M. BROWN. 2009. Do geological or climatic processes drive speciation in dynamic archipelagos? The tempo and mode of diversification in Southeast Asian shrews. *Evolution* 63:2595–2610.
- FELSENSTEIN, J. 1985. Confidence limits on phylogenies: an approach using the bootstrap. *Evolution* 39:783–791.
- FRANCIS, C. M. 2008. *A guide to the mammals of Southeast Asia*. Princeton University Press, Princeton, New Jersey.
- FREY, J. K. 1993. Mode of peripheral isolate formation and speciation. *Systematic Biology* 42:373–381.
- FUTUYMA, D. J. 1998. *Evolutionary biology*. 3rd ed. Sinauer Associates, Inc., Sunderland, Massachusetts.
- GYLDENSTOLPE, N. 1916. Zoological results of the Swedish Zoological Expeditions to Siam 1911–1912 & 1914–1915 V. *Mammals II. Kungl Svenska Vetenskapsakademiens Handlingar* 57:34.

- GOROG, A. J., SINAGA, M. H., AND M. D. ENGSTROM. 2004. Vicariance or dispersal? Historical biogeography of three Sunda shelf murine rodents (*Maxomys surifer*, *Leopoldamys sabanus*, and *Maxomys whiteheadi*). *Biological Journal of the Linnean Society* 81:91–109.
- GRAY, J. E. 1842. Description of some new genera and fifty unrecorded species of Mammalia. *Annals and Magazine of Natural History* 10:255–267.
- GRISMER, L. L., N. V. TRI, AND J. L. GRISMER. 2010. A colorful new species of insular rock gecko (*Cnemaspis* Strauch, 1887) from southern Vietnam. *Zootaxa* 2352:46–58.
- HANEBUTH, T., K. STATTEGGER, AND P. M. GROOTES. 2000. Rapid flooding of the Sunda shelf: a late-glacial sea-level record. *Science* (New York, N.Y.) 288:1033–1035.
- HARRISON, T., J. KRIGBAUM, AND J. MANSER. 2006. Primate biogeography and ecology on the Sunda Shelf islands: a paleontological and zooarchaeological perspective. Pp. 331–372 in *Primate biogeography* (S. M. Lehman and J. G. Fleagle, eds.). Springer Science and Business Media, LLC, New York.
- HAYASHIDA, A., ET AL. 2007. Geographical variation in skull morphology of gray-bellied squirrel *Callosciurus caniceps*. *The Journal of Veterinary Medical Science* 69:149–157.
- HALL, R. 1998. The plate tectonics of Cenozoic SE Asia and the distribution of land and sea. Pp. 99–131 in *Biogeography and geological evolution of SE Asia* (J. D. Holloway and R. Hall, eds.). Backhuys Publishers, Leiden, the Netherlands.
- HALL, R. 2009. Southeast Asia's changing palaeogeography. *Blumea* 54:148–161.
- HOFFMANN, R. S., AND A. T. SMITH. 2008. Family Sciuridae. Pp. 172–196 in *A guide to the mammals of China* (A. T. Smith and Y. Xie, eds.). Princeton University Press, Princeton, New Jersey.
- HUELSENBECK, J. P., AND F. RONQUIST. 2001. MrBayes: Bayesian inference of phylogenetic trees. *Bioinformatics* (Oxford, England) 17:754–755.
- HUTCHISON, C. 1989. *Geological evolution of South-east Asia*. Clarendon Press, Oxford, United Kingdom.
- KASHIWAYA, K., S. OCHIAI, H. SAKAI, AND T. KAWAI. 2001. Orbit-related long-term climate cycles revealed in a 12-myrr continental record from Lake Baikal. *Nature* 410:71–74.
- KLOSS, C. B. 1916. Diagnoses of four new squirrels from Siam. *The Journal of the Natural History Society of Siam* 2:178.
- KOCHER, T. D., ET AL. 1989. Dynamics of mitochondrial DNA evolution in animals: amplification and sequencing with conserved primers. *Proceedings of the National Academy of Sciences of the USA* 86:6196–6200.
- KUZNETSOV, G. 2000. Mammals of coastal islands of Vietnam: zoogeographical and ecological aspects. Pp. 357–366 in *Proceedings of the 4th International Symposium of Zoologisches Forschungsinstitut und Museum A. Koenig, Bonn, May 13–17, 1999* (G. Rheinwald, ed.). Zoologisches Forschungsinstitut und Museum A. Koenig, Bonn, Germany.
- LEKAGUL, B., AND J. A. MCNEELY. 1988. *Mammals of Thailand*. 2nd ed. Darnsutha Press, Bangkok, Thailand.
- LI, S., ET AL. 2008. Molecular phylogeny of five species of *Dremomys* (Rodentia: Sciuridae), inferred from cytochrome *b* gene sequences. *Zoological Scripta* 37:349–354.
- LUNDE, D., AND N. T. SON. 2001. An identification guide to the rodents of Vietnam. American Museum of Natural History, New York.
- MACKINNON, K., G. HATTA, H. HALIM, AND A. MANGALIC. 1996. *The ecology of Kalimantan: Indonesian Borneo*. Periplus Editions Ltd., Singapore, Singapore.
- MEDWAY, L. 1978. *The wild mammals of Malaya (Peninsular Malaysia) and Singapore*. 2nd ed. Oxford University Press, Kuala Lumpur, Malaysia.
- MEIJARD, E. 2003. Mammals of south-east Asian islands and their Late Pleistocene environments. *Journal of Biogeography* 30:1245–1257.
- MEIJARD, E., AND C. P. GROVES. 2006. The geography of mammals and rivers in mainland Southeast Asia. Pp. 305–329 in *Primate biogeography* (S. M. Lehman and J. G. Fleagle, eds.). Springer Science and Business Media, LLC, New York.
- MERCER, J. M., AND V. L. ROTH. 2003. The effects of Cenozoic global change on squirrel phylogeny. *Science* (New York, N.Y.) 299:1568–1572.
- MILLER, G. S. 1903. Seventy new Malaysian mammals. *Smithsonian Miscellaneous Collections* 45:1–73.
- MILLER, M. A., ET AL. 2015. A restful API for access to phylogenetic tools via the CIPRES Science Gateway. *Evolutionary Bioinformatics Online* 11:43–48.
- MINISTRY OF CULTURE, SPORT AND TOURISM, VIETNAM. 2017. Vietnam tourism. <http://www.vietnamtourism.com/index.php/tourism/items/1391>. ACCESSED 14 May 2017.
- MOORE, J. C., AND G. H. H. TATE. 1965. A study of the diurnal squirrels, Sciurinae, of the Indian and Indo Chinese subregions. *Fieldiana: Zoology* 48:1–351.
- MUSSER, G. G., D. P. LUNDE, AND N. T. SON. 2006. Description of a new genus and species of rodent (Murinae, Muridae, Rodentia) from the Tower Karst Region of northeastern Vietnam. *American Museum Novitate* 3517:41.
- NATER, A., ET AL. 2017. Morphometric, behavioral, and genomic evidence for a new orangutan species. *Current Biology* 27:3487–3498. e10.
- NGO, N. H., N. Q. TRUONG, N. V. TAN, F. BARSCH, T. ZIEGLER, AND M. V. SCHINGEN. 2016. First population assessment of the endemic insular psychedelic rock gecko (*Cnemaspis psychedelica*) in southern Vietnam with implications for conservation. *Amphibian and Reptile Conservation* 10:18–26.
- NGUYEN, C. T. 2017. The flora in Hon Khoai Island, Ca Mau province. Institute of Ecology and Biological Resource, Vietnam Academy of Science and Technology, Hanoi, Vietnam.
- OSHIDA, T., ET AL. 2011. Phylogenetic relationships between *Callosciurus caniceps* and *C. inornatus* (Rodentia, Sciuridae): implication for zoogeographical isolation by the Mekong River. *Italian Journal of Zoology* 78:328–335.
- OSHIDA, T., ET AL. 2013. Phylogenetic position of *Callosciurus erythraeus griseimanus* from Vietnam in the genus *Callosciurus*. *Mammal Study* 38:41–47.
- OSHIDA, T., J.-L. LEE, L.-K. LIN, AND Y.-J. CHEN. 2006. Phylogeography of Pallas's squirrel in Taiwan: geographical isolation in an arboreal small mammal. *Journal of Mammalogy* 87:247–254.
- OSHIDA, T., L. K. LIN, R. MASUDA, AND M. C. YOSHIDA. 2000. Phylogenetic relationships among Asian species of *Petaurista* (Rodentia, Sciuridae), inferred from mitochondrial cytochrome *b* gene sequences. *Zoological Science* 17:123–128.
- OSHIDA, T., M. YASUDA, H. ENDO, N. A. HUSSEIN, AND R. MASUDA. 2001. Molecular phylogeny of five squirrel species of the genus *Callosciurus* (Mammalia, Rodentia) inferred from cytochrome *b* gene sequences. *Mammalia* 65:473–482.
- OSHIDA, T., M. YASUDA, AND M. SASAKI. 2016. Preliminary study on phylogeography of *Callosciurus prevostii* in Southeast Asia: mitochondrial DNA evidence supports riverine barrier hypothesis. *Mammal Study* 41:149–154.

- PAYNE, J., C. M. FRANCIS, AND K. PHILIPPS. 1985. A field guide of the mammals of Borneo. Pencetak Weng Fatt Sdn. Bhd., Kuala Lumpur, Malaysia.
- POSADA, D., AND K. A. CRANDALL. 1998. MODELTEST: testing the model of DNA substitution. *Bioinformatics* (Oxford, England) 14:817–818.
- ROBINSON, H. C., AND C. B. KLOSS. 1914. On new mammals from the Malay Peninsula. *Annals and Magazine of Natural History* 13:223–234.
- ROBINSON, H. C., AND R. C. WROUGHTON. 1911. On five new subspecies of oriental squirrels. *Journal of the Federated Malay States Museums* 4:233–235.
- RODRÍGUEZ, F., J. L. OLIVER, A. MARÍN, AND J. R. MEDINA. 1990. The general stochastic model of nucleotide substitution. *Journal of Theoretical Biology* 142:485–501.
- RUEDAS, L. A., AND J. A. W. KIRSCH. 1997. Systematics of *Maxomys* Sody, 1936 (Rodentia: Muridae: Murinae): DNA/DNA hybridization studies of some Borneo-Javan species and allied Sundaic and Australo-Papuan genera. *Biological Journal of the Linnean Society* 61:385–408.
- RUNDEL, P. W. 1999. Forest habitats and flora in Laos PDR, Cambodia, and Vietnam. Conservation Priorities in Indochina-WWF Desk Study. Indochina Programme Office, Hanoi, Vietnam.
- SAITOU, N., AND M. NEI. 1987. The neighbor-joining method: a new method for reconstructing phylogenetic trees. *Molecular Biology and Evolution* 4:406–425.
- SALO, J., ET AL. 1986. River dynamics and the diversity of Amazon lowland forest. *Nature* 322:254–258.
- SHAMEL, H. H. 1930. Mammals collected on the island Koh Tau off the east coast of the Malay Peninsula. *Journal of Mammalogy* 11:71–74.
- SIKES, R. S.; Animal Care and Use Committee of the American Society of Mammalogists. 2016. 2016 Guidelines of the American Society of Mammalogists for the use of wild mammals in research and education. *Journal of Mammalogy* 97:663–688.
- STAMATAKIS, A. 2014. RAxML version 8: a tool for phylogenetic analysis and post-analysis of large phylogenies. *Bioinformatics*. 30:1312–1313.
- SWOFFORD, D. L. 2001. PAUP\*: phylogenetic analysis using parsimony (\*and other methods). Version 4.0 beta. Sinauer, Sunderland, Massachusetts.
- TEMMINCK, C. J. 1853. Esquisses zoologiques sur la côte de Guinée. E. J. Brill, Leiden, the Netherlands.
- THOMAS, O. 1922. Scientific results from the mammal survey: two new rodents from the Mergui Archipelago. *Journal of the Bombay Natural History Society* 28:1967–1068.
- THOMAS, O. 1923. Scientific results from the mammal survey 43: on some squirrels from the Mergui Archipelago. *Journal of the Bombay Natural History Society* 29:376–377.
- THOMAS, O., AND H. C. ROBINSON. 1921. Some new insular squirrels of the *Callosciurus caniceps-concolor* group from Peninsular Siam. *Annals and Magazine of Natural History* 7:118–123.
- THOMAS, O., AND R. C. WROUGHTON. 1909. Diagnoses of new mammals collected by Mr. H. C. Robinson in the islands of the Straits of Malacca. *Annals and Magazine of Natural History* 4:534–536.
- THORINGTON, R. W., JR., AND R. S. HOFFMANN. 2005. Family Sciuridae. Pp. 754–818 in *Mammal species of the world: a taxonomic and geographic reference*. 3rd ed. (D. E. Wilson AND D. M. Reeder, eds.). Johns Hopkins University Press, Baltimore, Maryland.
- THORINGTON, R. W., JR., J. L. KOPROWSKI, M. A. STEELE, AND J. F. WHATTON. 2012. *Squirrels of the world*. Johns Hopkins University Press, Baltimore, Maryland.
- TJIA, H. D. 1980. The Sunda shelf, Southeast Asia. *Zeitschrift fuer Geomorphologie* 24:405–427.
- TRAN, D. T., L. D. AN, N. H. CU, T. D. LAN, N. V. QUAN, AND T. B. PHUONG. 2012. Sea of Vietnam-position resources and typical geological and ecological wonders. Natural Science and Technology Publishing House, Hanoi, Vietnam.
- WILLIAMS, M. A. J., D. L. DUNKERLEY, P. D. DECKKER, A. P. KERSHAW, AND T. STOKES. 1993. Quaternary environments. Edward Arnold, London, United Kingdom.
- YANG, Z., N. GOLDMAN, AND A. FRIDAY. 1994. Comparison of models for nucleotide substitution used in maximum-likelihood phylogenetic estimation. *Molecular Biology and Evolution* 11:316–324.
- YUAN, S-L., ET AL. 2013. A mitochondrial phylogeny and biogeographical scenario for Asiatic water shrews of the genus *Chimarrogale*: implications for taxonomic and low-latitude migration routes. *PLoS ONE*. 8:e77156.

Submitted 9 November 2017. Accepted 22 May 2018.

Associate Editor was Luis Ruedas.
